# Supplementary material
Source: PubMed Central journal article supplement (PMC2951278)
Supplement: NIHMS225884-supplement-1.pdf [file NIHMS225884-supplement-1.pdf]

**Reduced histone biosynthesis and chromatin changes arising from a damage signal at telomeres**

Roderick J. O'Sullivan<sup>1</sup>, Stefan Kubicek<sup>2</sup>, Stuart L. Schreiber<sup>2,3,4</sup>, and Jan Karlseder<sup>1,5</sup>

<sup>1</sup>The Salk Institute for Biological Studies  
Molecular and Cellular Biology Department  
10010 North Torrey Pines Rd.  
La Jolla, CA92037  
USA

<sup>2</sup>The Broad Institute of Harvard and MIT, 7 Cambridge Center, Cambridge, MA02142, USA

<sup>3</sup>Howard Hughes Medical Institute, Harvard University, 7 Divinity Avenue, Cambridge, MA 02138, USA

<sup>4</sup>Department of Chemistry and Chemical Biology, Harvard University, 7 Divinity Avenue, Cambridge, MA 02138, USA

<sup>5</sup> To whom correspondence should be addressed

Email: [Karlseder@salk.edu](mailto:Karlseder@salk.edu)

Phone: 858 453 4100 x1867

Fax: 858 457 4765

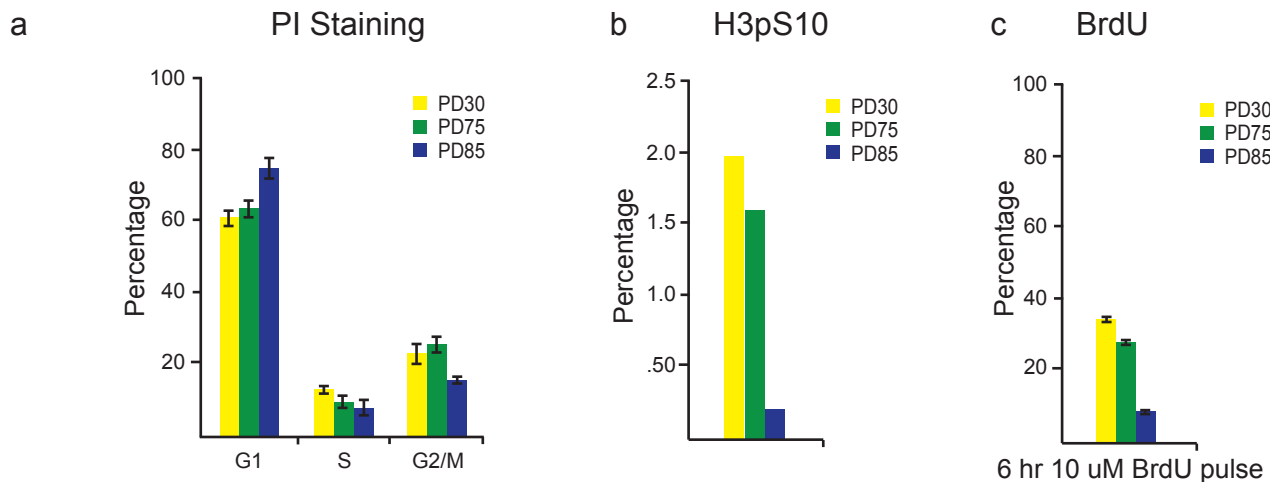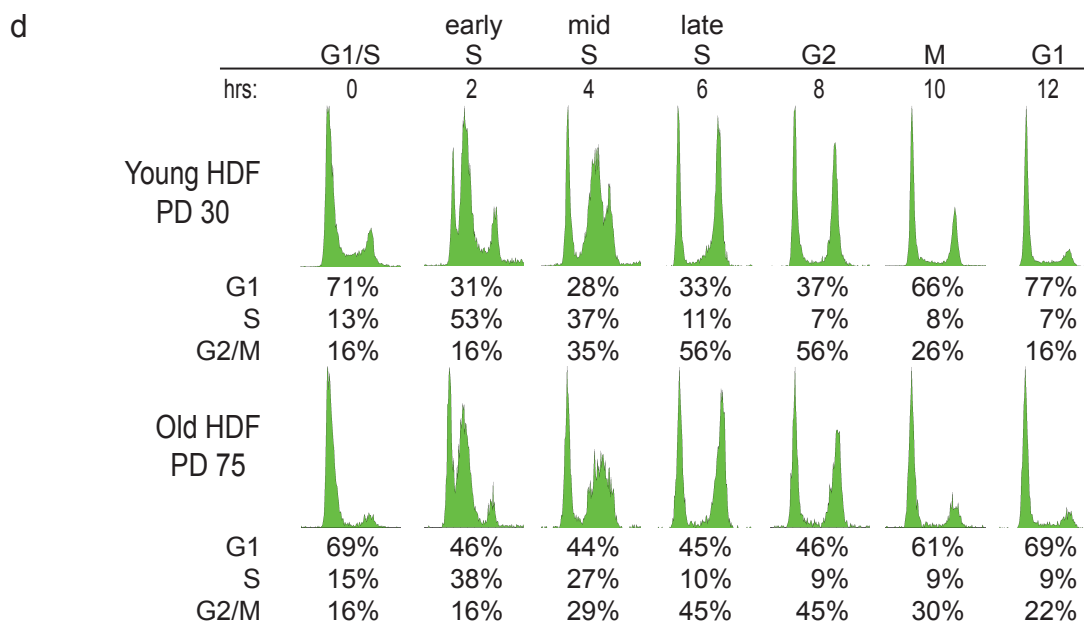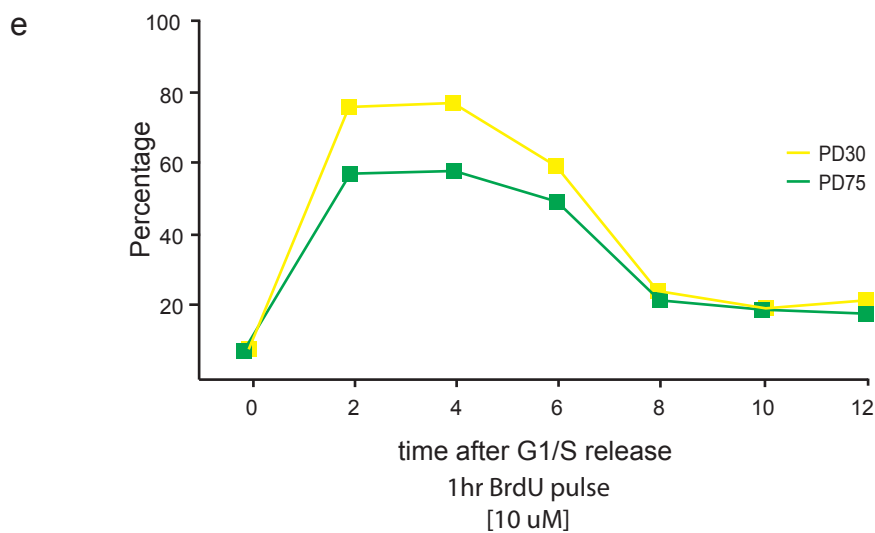

**Supplementary Figure 1** Similar cell cycle dynamics of early and late passage fibroblast populations **(a)** Histone H3 and H4 expression of IMR90, IMR90 expressing HPV16 E6 and E7, HCT116 with functional p53 and HCT116 without a p53 allele. Cells were subjected to 6 days of 500ng/ml of bleomycin where indicated. Error bars represent the standard deviation of three independent experiments. **(b)** Histone H3 serine 10 phosphorylation was determined by FACS analysis in populations of PD30, PD75 and senescent IMR90 lung fibroblasts. The percentages of H3S10ph positive cells are indicated. **(c)** BrdU incorporating fractions from populations of PD30, PD75 and senescent IMR90 lung fibroblasts have been determined by FACS. The percentages of BrdU positive cells are indicated. Error bars represent the standard deviation of three independent experiments. **(d)** FACS analysis to monitor cell cycle progression following release from thymidine-aphidicolin G1/S block. Indicated above each plot is the cell cycle phase as extrapolated from measurement of DNA content according to PI staining at each time point. Percentages of cells in each cell cycle phase are indicated below the FACS diagrams. **(e)** BrdU incorporation profiles of PD30 and PD75 IMR90 populations at 2 hour intervals. The percentage of BrdU incorporating cells and hours after G1/S release are indicated.

Supplementary Fig. 2  
O'Sullivan et al. 2010

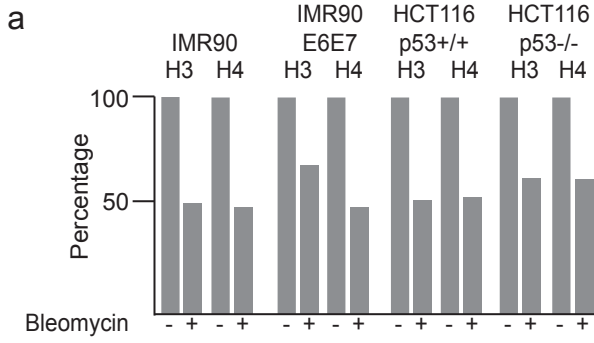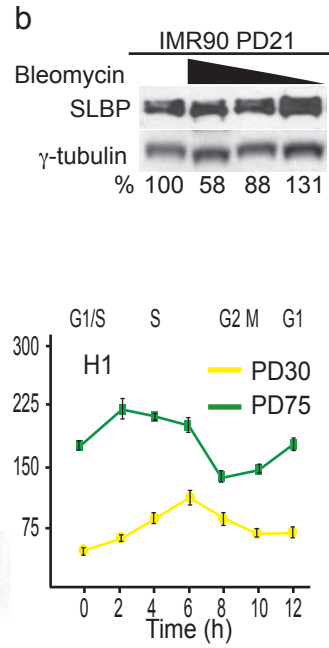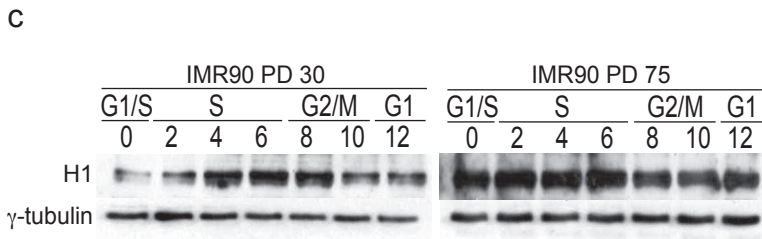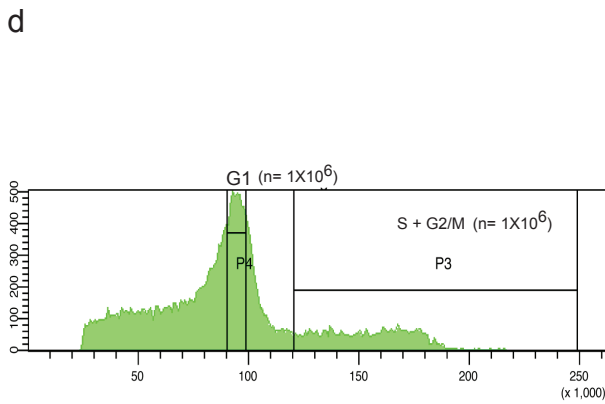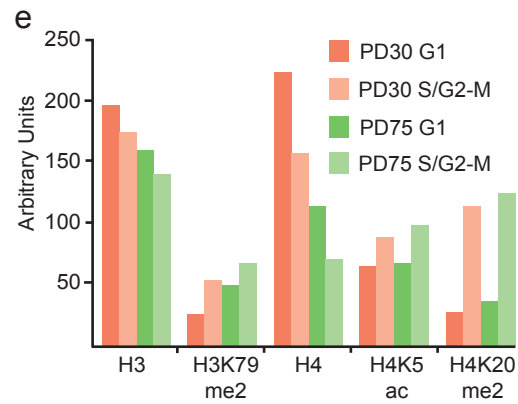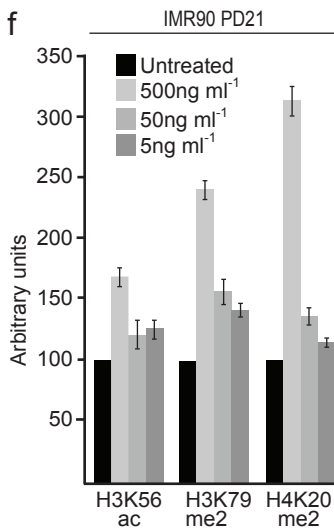

**Supplementary Figure 2** H3 and H4 expression respond to DNA damage. **(a)** H3 and H4 expression (%) in IMR90, IMR90 expressing HPV16 E6 and E7, HCT116 cells expressing wild type p53 and HCT116 cells deleted for p53. The cultures have been grown in the presence of 500ng/ml bleomycin where indicated. **(b)** Expression of SLBP in IMR90 fibroblasts treated for 6 days with 500, 50 or 5 ng/ml of Bleomycin.  $\gamma$ -tubulin serves as a loading control. The percent expression change of two independent experiments has been indicated. **(c)** Cell cycle expression of H1 in PD30 and PD75 HDFs. Hours after G1/S release are indicated and corresponding cell cycle phases have been determined by FACS analysis.  $\gamma$ -tubulin serves as loading control. Quantifications of cell cycle expression patterns of H1 from PD30 (yellow lines) and PD75 (green lines) are shown on the right. Cell cycle phases are indicated on top and hours after release from G1/S on the bottom. Corresponding cell cycle phases have been determined by FACS analysis. The error bars represent the standard deviation of three independent experiments. **(d)** Hoechst 33342 incorporating cells were sorted from early and late passage IMR90 populations. Gates used for sorting and isolation of pure G1 and S/G2/M populations have been indicated. **(e)** Analysis of H3, H3K79me2, H4, H4K5Ac, and H4K20me2 expression in G1 phase and S/G2/M phase fractions of cycling early and late passage IMR90 cells. Expression levels were normalized to  $\gamma$ -tubulin loading control and indicated in arbitrary units. **(f)** H3K56ac, H3K79me2 and H4K20me2 in early passage IMR90 HDFs treated for 6 days with 500, 50 and 5ng/ml of bleomycin. Error bars represent the standard deviation of three independent experiments.

Supplementary Fig. 3  
 O'Sullivan et al. 2010

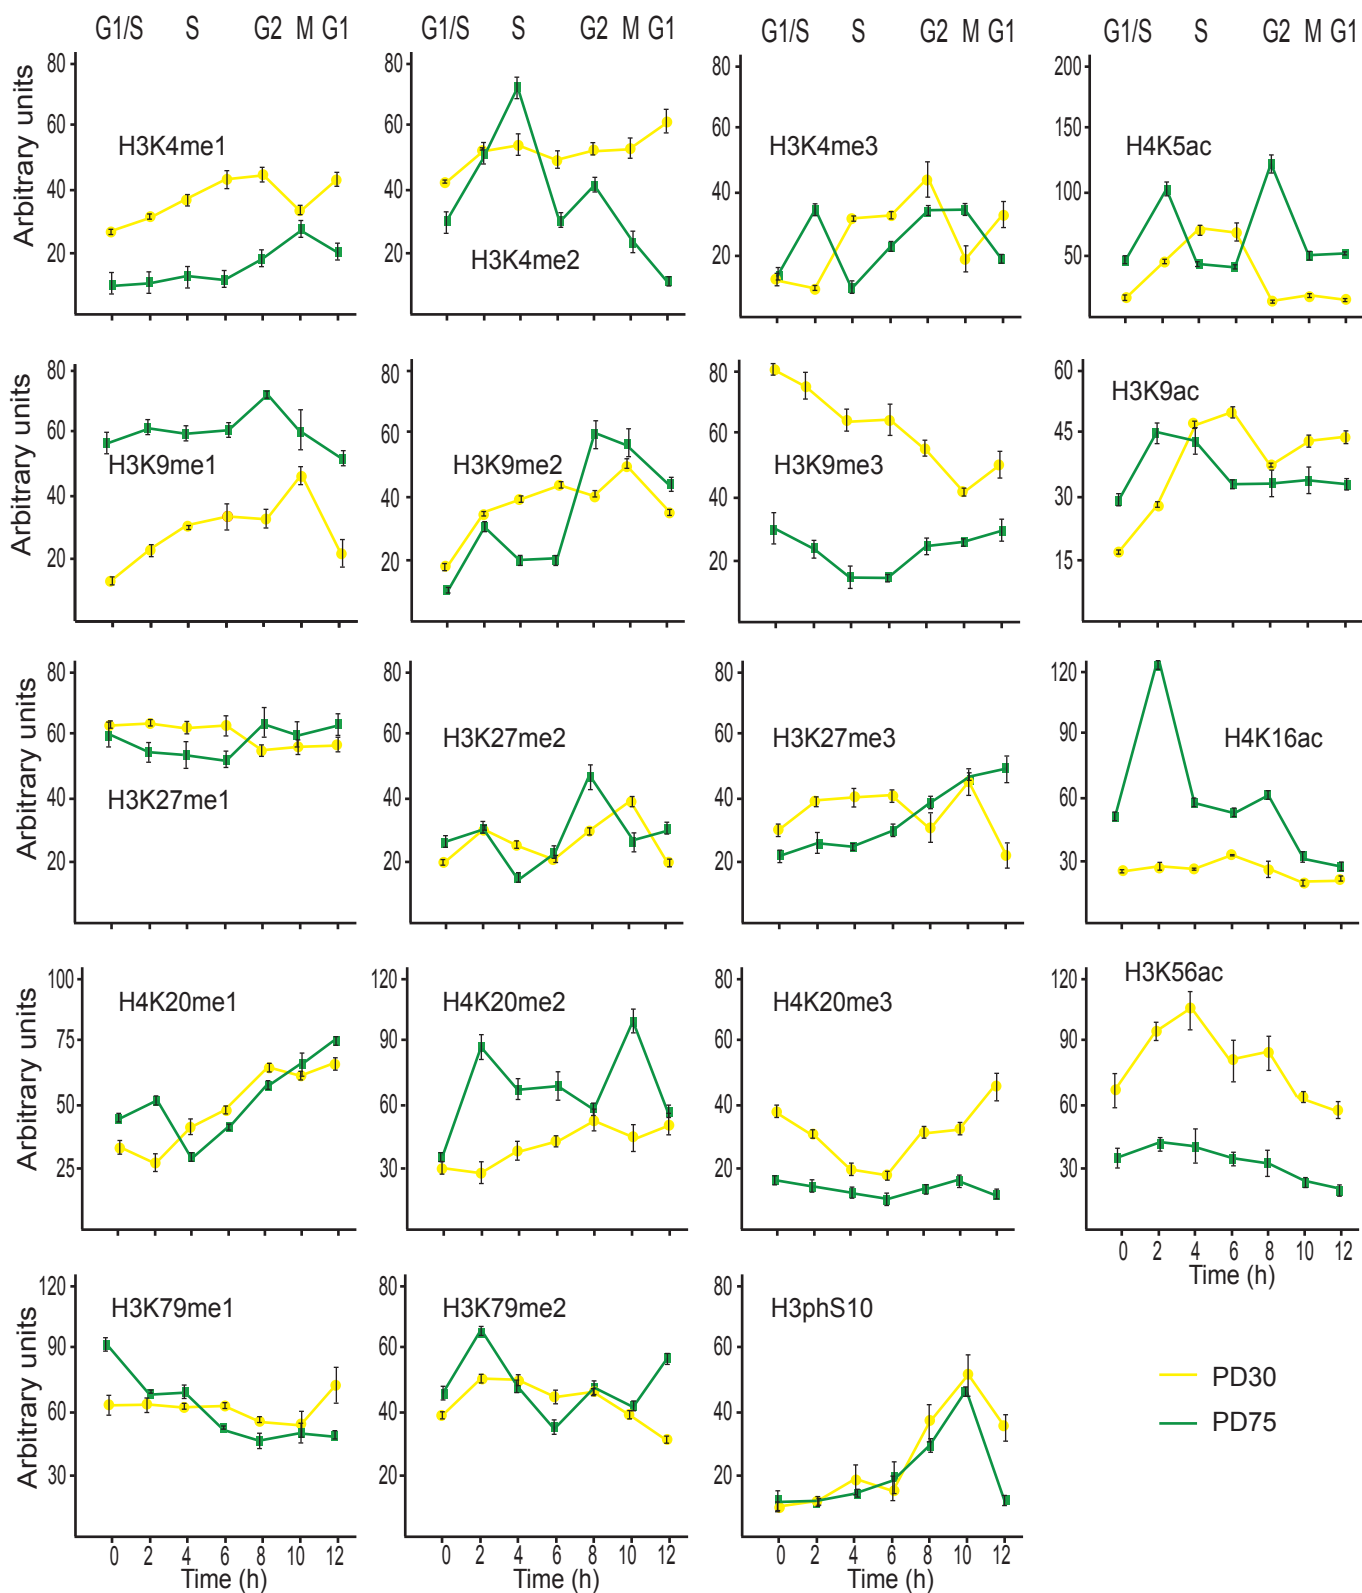

**Supplementary Figure 3** Altered redistribution of epigenetic marks upon cellular aging. Quantifications of cell cycle distribution of histone modifications in whole cell extracts from PD30 (yellow lines) and PD75 (green lines) HDFs. Shown are cell cycle patterns of H3K4me1/2/3, H4K5Ac, H3K9me1/2/3, H3K9Ac, H3K27me1/2/3, H4K16Ac, H4K20me1/2/3, H3K56ac, H3S10ph, H3K79me1/2 and H3phS10. Enrichments were calculated relative to corresponding core histones. Cell cycle phases are indicated on top and hours after release from G1/S on the bottom. Corresponding cell cycle phases have been determined by FACS analysis. The error bars represent the standard deviation of three independent experiments.

Supplementary Fig. 4  
O'Sullivan et al. 2010

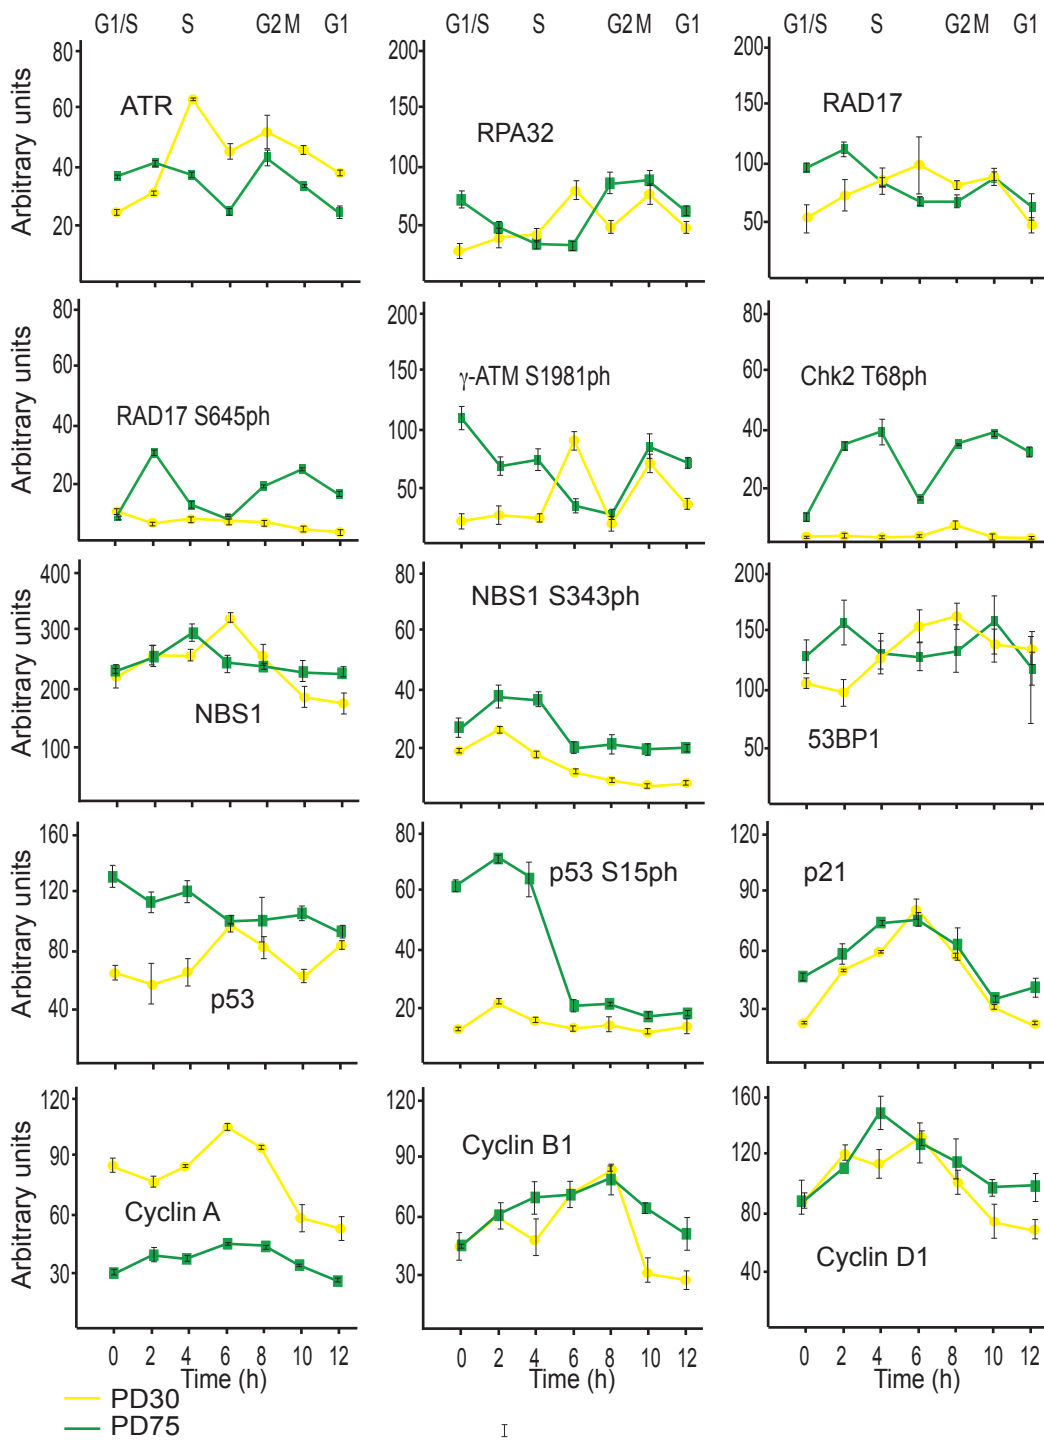

I



**Supplementary Figure 4** DNA damage accumulation and DDR activation upon cellular aging. Quantification of expression of PCNA, Rpa32, Rad51, ATR, Rad17, Rad17-pS645,  $\gamma$ -ATM pS1981, Chk2-pT68, NBS1, NBS1S343ph, 53BP1, p53, p53S15ph, p21 and Cyclins A/B1D1 in whole cell extracts of PD30 (yellow lines) and PD75 (green lines) HDFs. Expression levels were calculated relative to  $\gamma$ -tubulin. Corresponding cell cycle phases have been determined by FACS analysis and are indicated on top and hours after release from G1/S on the bottom. The error bars represent the standard deviation of three independent experiments.

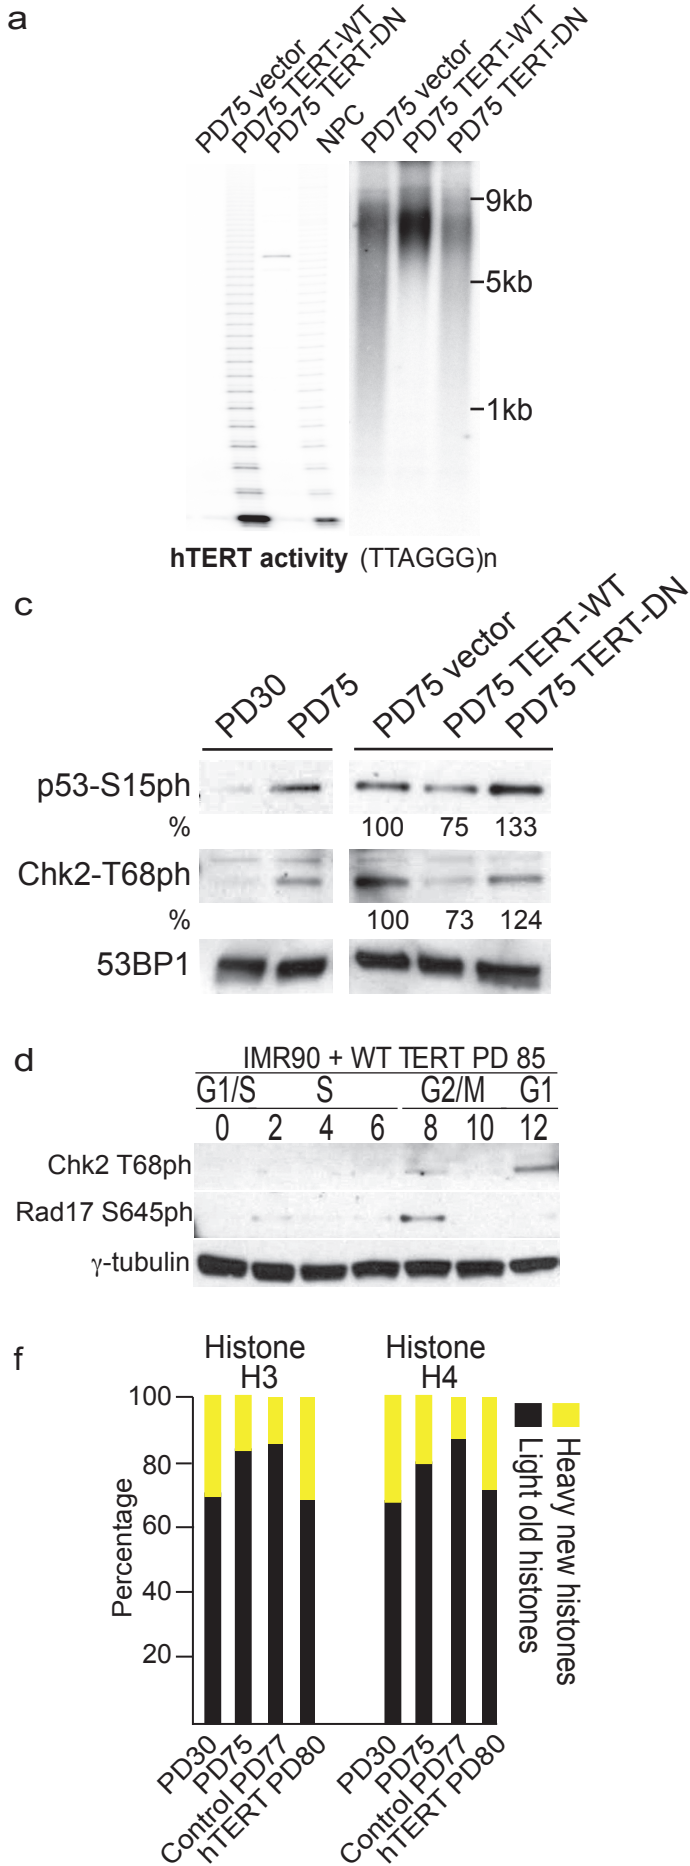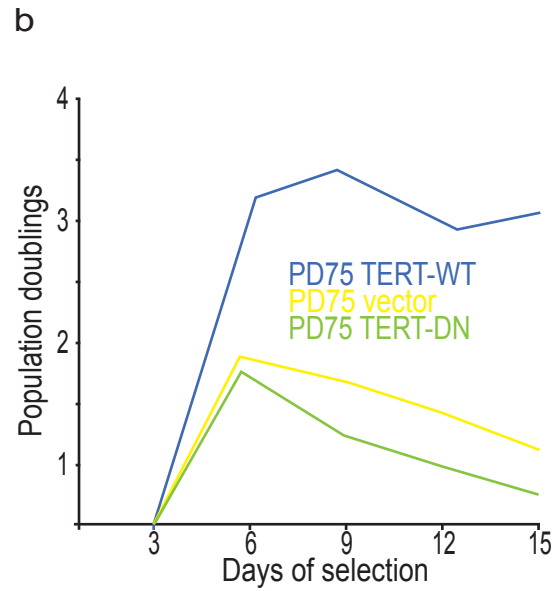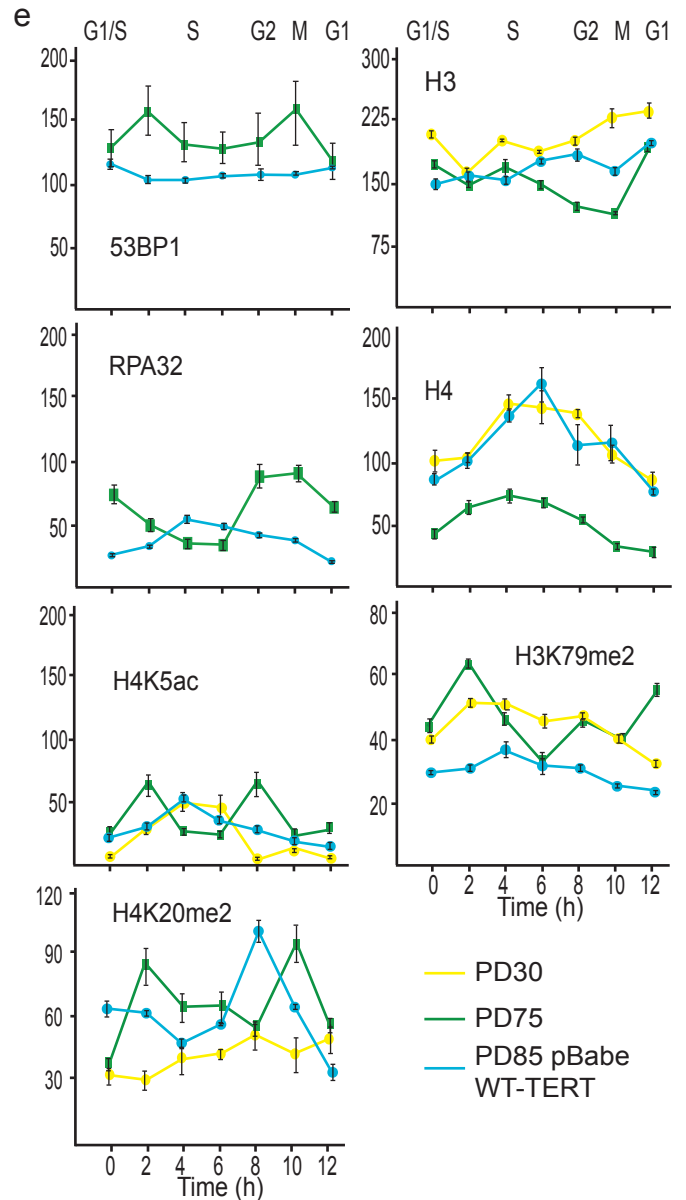

**Supplementary Figure 5** Expression of hTERT in PD75 IMR90 fibroblasts. **(a)** Telomerase activity and telomere length in PD75 IMR90 fibroblasts, PD75 cells expressing wild type hTERT (TERT-WT), PD75 cells expressing dominant negative hTERT (TERT-DN). Neuronal precursor stem cell (NPC) nuclear extract served as positive control for telomerase activity. **(b)** Proliferation curves of IMR90 fibroblasts expressing wild type hTERT, a control vector of dominant negative hTERT. **(c)** Expression of p53-S15ph, Chk2-T68ph and 53BP1 in young PD30, old PD75 and PD75 cells expressing wild type hTERT (TERT-WT), PD75 cells expressing dominant negative hTERT (TERT-DN). The percentile of p53S15ph and CHK2 T68ph in relation to  $\gamma$ -tubulin is indicated. **(d)** Expression of Chk2-pT68 and Rad17-pS645 in whole cell extracts of PD85 cells expressing hTERT. 75,000 cell equivalents were loaded per lane and equal loading was confirmed by ponceau staining prior to probing with primary antibodies. Hours after G1/S release are indicated and corresponding cell cycle phases have been determined by FACS analysis and indicated.  $\gamma$ -tubulin serves as loading control. **(e)** Quantification of expression of 53BP1, Rpa32, H3, Hrk79me2, H4, H4K5ac and H4K20me2 in whole cell extracts of early passage HDFs (yellow lines), late passage HDFs (PD75, green lines) and of late passage HDFs expressing catalytically active hTERT (PD85, blue lines). Expression levels were calculated relative to  $\gamma$ -tubulin. Corresponding cell cycle phases have been determined by FACS analysis and are indicated on top and hours after release from G1/S on the bottom. The error bars represent the standard deviation of three independent experiments. **(f)** SILAC labeling of PD30, PD75, PD77 (control) and PD80

(hTERT expressing) HDFs and mass spectroscopy of histone proteins. Shown are percentages of newly synthesized histones (yellow) and histones from previous cell cycle (black).

TTAGGG

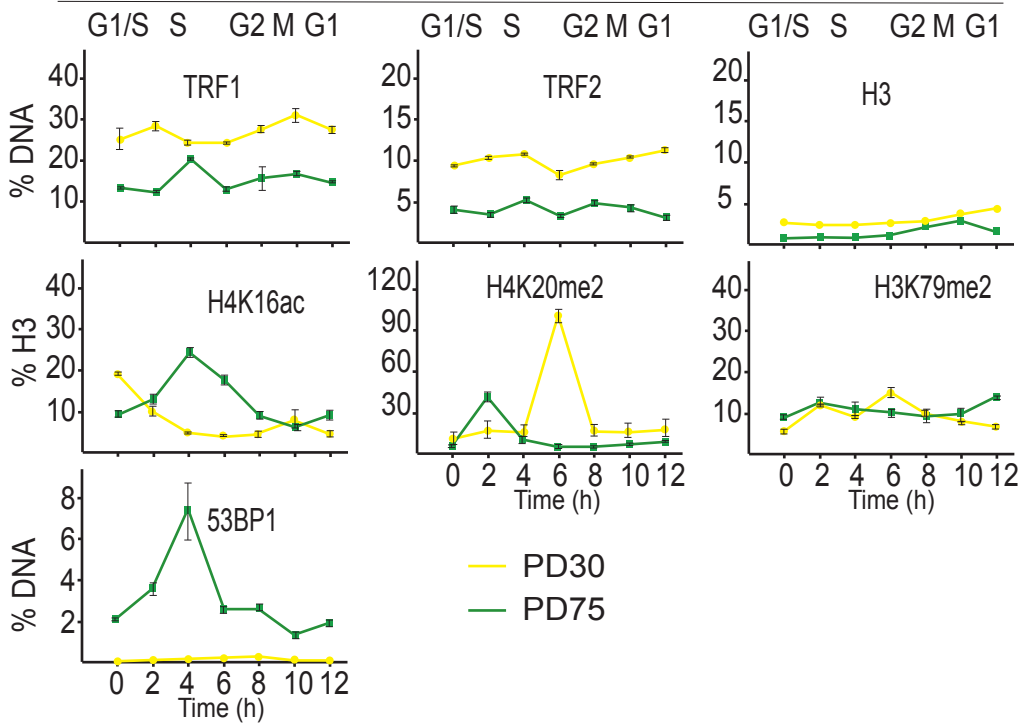

Subtelomeric 17P

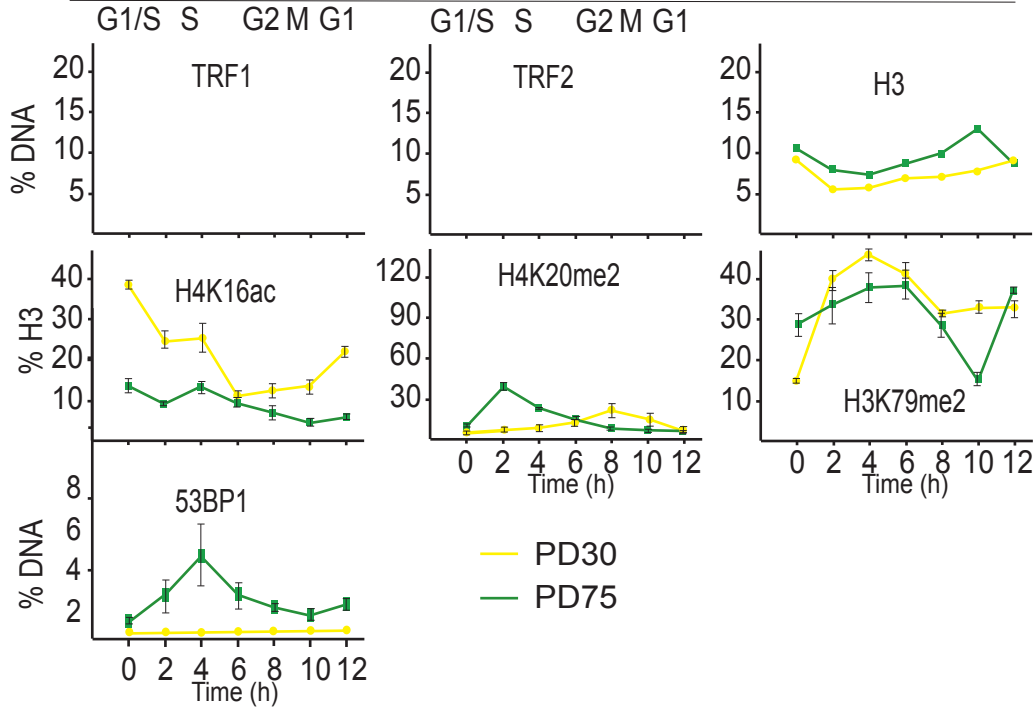

**Supplementary Figure 6** Telomeric and subtelomeric histone modifications upon cellular aging. Quantifications of cell cycle distribution of histone modifications at telomeres and 17P in PD30 (yellow lines) and PD75 (green lines) HDFs. Shown are cell cycle binding patterns of TRF1, TRF2, H3, H4K16Ac, H4K20me2, H3K79me2, and 53BP1 as determined by ChIP. Cell cycle phases are indicated on top and hours after release from G1/S on the bottom. Corresponding cell cycle phases have been determined by FACS analysis. The error bars represent the standard deviation of three independent experiments.

## Supplementary Table 1

| Antibody              | Source/Company     | Cat #       | Lot #      | Reference |
|-----------------------|--------------------|-------------|------------|-----------|
| H3                    | Abcam              | 1791        | 494671     |           |
| H4                    | Abcam              | 7311        | 627417     |           |
| H2A                   | Active Motif       | 39209       |            |           |
| H2B                   | Active Motif       | 39125       |            |           |
| SLBP                  | Sigma/Aldrich      | WH0007884M1 |            |           |
| H3K4me1               | Upstate/Millipore  | 07-436      |            |           |
| H3K4me2               | Upstate/Millipore  | 07-030      |            |           |
| H3K4me3               | Upstate/Millipore  | 05-745      |            |           |
| H3K9me1, me2          | Thomas Jenuwein    |             |            | 20        |
| H3K9me3               | Thomas Jenuwein    |             |            | 20        |
| H3K9me3               | Abcam              | 8988        | 638466     |           |
| H3K9me3               | Active Motif       | 39161       | 170        |           |
| H3K9ac                | Abcam              | 4441        |            |           |
| H3S10 ph              | Upstate/Millipore  | 06-570      | 32219      |           |
| H3K27me1, me2,<br>me3 | Thomas Jenuwein    |             |            | 20        |
| H3K79me1              | Active Motif       | 39146       | 172        |           |
| H3K79me2              | Abcam              | 3594        | 621252     |           |
| H4K5ac                | Serotec            | AHP962      | 251105     |           |
| H4K16ac               | Abcam              |             |            |           |
|                       | Active Motif       | 23352       | 107        |           |
|                       | Upstate/Millipore  | 07-329      | JBC1355136 |           |
| H3K56ac               | Upstate/Millipore  | 07-677      | JBC1361855 |           |
| H4K20me1              | Thomas Jenuwein    | 0077        |            | 57        |
|                       | Active Motif       | 39539       | 01008001   |           |
| H4K20me2              | Thomas Jenuwein    | 0080        |            | 57        |
| H4K20me3              | Thomas Jenuwein    | 0083        |            | 57        |
| 53BP1 (H-300)         | Santa Cruz         | 22760       | J2507      |           |
| Asf1a/b               | Genevieve Almouzni |             |            | 3,38      |
| SLBP                  | Sigma              | WH0007884M1 |            |           |
| ATM                   | Bethyl             | A300-299A   | A2         |           |
| ATM S1981 ph          | Rockland           | 200-301-400 | 20772      |           |
| ATR                   | Abcam              | 10312       | 534864     |           |
| BrdU                  | Bd Biosciences     | 347580      |            |           |
| CAF1 p150             | Abcam              | 7655        | 683997     |           |
| CAF1 p60              | Bethyl             | A201-085A   | A1         |           |
| Chk2 T68 ph           | CST                | 2661        |            |           |
| Cyclin A, B1, D1      | Tony Hunter        |             |            | 58        |
| HP1 $\alpha$          | Upstate/Millipore  | MAB3446     |            |           |
| HP1 $\gamma$          | Upstate/Millipore  | MAB3450     |            |           |
| p21                   | Upstate/Millipore  | 05-655      | 27757      |           |
| p53 (DO1)             | Santa Cruz         | 126         | H2707      |           |
| p53 S15 ph            | CST                | 9254        | 9          |           |
| PCNA                  | Santa Cruz         | 7907        | H1605      |           |
| RAD17 (H-300)         | Santa Cruz         | 5613        | K1904      |           |
| RAD17 S645 ph         | CST                | 3421        | 2          |           |
| RAD51 (H92)           | Santa Cruz         | 8349        | 8349       |           |
| RPA32                 | Abcam              | 2175        | 314161     |           |
| TRF1, 2               | Karlseder Lab      | 6840        |            | 55        |
| $\gamma$ -Tubulin     | Sigma-Aldrich      | GTU-88      |            |           |

### Supplementary References.

57. Martens, J.H. et al. The profile of repeat-associated histone lysine methylation states in the mouse epigenome. *EMBO J* **24**, 800-12 (2005).
58. Pines, J. & Hunter, T. Human cyclins A and B1 are differentially located in the cell and undergo cell cycle-dependent nuclear transport. *J Cell Biol* **115**, 1-17 (1991).
